# Supplementary material for: The number of undocumented immigrants in the United States: Estimates based on demographic modeling with data from 1990 to 2016
Source: PLoS One. 2018 Sep 21;13(9):e0201193. doi: 10.1371/journal.pone.0201193 (PMC6150478; doi:10.1371/journal.pone.0201193)
Supplement: S2 File — The spreadsheet used to calculate the conservative estimate. (XLSX) [file pone.0201193.s002.xlsx]

## Sheet: Inputs & Population Trajectory 
Input Parameters	Value
Initial Population	3500000
Visa Overstay Rate	0.0844576
1990-2004 Apprehension Rate	0.39
First Year Emigration Rate	0.4
Year 2-10 Emigration Rate	0.04
More Than 10 Years Emigration Rate	0.01
Mortality Rate	0.007
Population Trajectory
Year	Population at the Beginning of the Year
1990	3500000
1991	4.5028e+06
1992	5.49356e+06
1993	6.46551e+06
1994	7.44492e+06
1995	8.17121e+06
1996	9.16144e+06
1997	1.03186e+07
1998	1.12664e+07
1999	1.22949e+07
2000	1.32955e+07
2001	1.44298e+07
2002	1.5039e+07
2003	1.53435e+07
2004	1.55891e+07
2005	1.61002e+07
2006	1.67206e+07
2007	1.72882e+07
2008	1.75097e+07
2009	1.75838e+07
2010	1.7407e+07
2011	1.72427e+07
2012	1.70581e+07
2013	1.68541e+07
2014	1.64481e+07
2015	1.64466e+07
2016	1.65567e+07
2017	1.6654e+07

## Sheet: Visa Overstayers
Year	Number of Non-Immigrant Visas Issued	Visa Overstay = (Overstay Rate) * (Number of Non-Immigrant Visas Issued)
1990	4850670	409676
1991	5026298	424509
1992	4576644	386532
1993	4418952	373214
1994	4551906	384443
1995	5106963	431322
1996	5333575	450461
1997	5162948	436050
1998	5148774	434853
1999	5164066	436145
2000	5268821	444992
2001	5241895	442718
2002	4003965	338165
2003	3642277	307618
2004	3821822	322782
2005	4174816	352595
2006	4722102	398817
2007	5188127	438177
2008	5398167	455916
2009	4661000	393657
2010	5026509	424527
2011	5910719	499205
2012	6958609	587707
2013	7416050	626342
2014	8220061	694246
2015	9.18986e+06	776153
2016	8755614	739478

## Sheet: Border Crossers
Year	Border Apprehensions	Number of Border Crossing (Using the Repeated Trial Model)
1990	1049321	1.64125e+06
1991	1077876	1.68591e+06
1992	1145574	1.7918e+06
1993	1212886	1.89708e+06
1994	979101	1.53141e+06
1995	1271390	1.98858e+06
1996	1507020	2.35713e+06
1997	1368707	2.1408e+06
1998	1516680	2.37224e+06
1999	1537000	2.40403e+06
2000	1643679	2.57088e+06
2001	1235718	1.93279e+06
2002	929809	1.45432e+06
2003	905065	1.41561e+06
2004	1139282	1.78195e+06
2005	1171396	1927000
2006	1071972	1780000
2007	858638	1321000
2008	705005	1000000
2009	540865	637000
2010	447731	575000
2011	327577	422000
2012	356873	475000
2013	414397	463000
2014	479371	430000
2015	331333	340000
2016	408000	420000
The number of border crossers for 1990 - 2004 are calculated using the repeated trial model with the probability of apprehension specified in the Inputs & Population Trajectory Sheet. The number of border crossers for 2005 to 2015 are taken directly from the DHS report specified in the paper (see reference 10). The 2016 number is derived by the repeated trial model, assuming that the probability …

## Sheet: Deportations & Adjustments
Year	Deportations	Adjustments	Deportations + Adjustments
1990	25369	37883	63252
1991	28568	35290	63858
1992	33921	42925	76846
1993	34023	44870	78893
1994	34921	38392	73313
1995	35765	41900	77665
1996	41426	55428	96854
1997	58954	54319	113273
1998	64797	61448	126245
1999	65287	60393	125680
2000	65279	72621	137900
2001	71191	176169	247360
2002	80836	114927	195763
2003	101750	119709	221459
2004	107313	84288	191601
2005	108056	79037	187093
2006	113576	64200	177776
2007	175344	94064	269408
2008	150078	100485	250563
2009	164839	104029	268868
2010	185128	88363	273491
2011	181555	90228.2	271783
2012	148153	247864	396017
2013	110094	523323	633417
2014	102224	181220	283444
2015	69478	114115	183593
2016	65332	167165	232497

## Sheet: Emigration & Mortality
Year	Emigration + Mortality
1990	984869
1991	1.0558e+06
1992	1.12953e+06
1993	1.212e+06
1994	1.11625e+06
1995	1.35201e+06
1996	1.55363e+06
1997	1.51571e+06
1998	1.65236e+06
1999	1.71393e+06
2000	1.74365e+06
2001	1.51892e+06
2002	1.29227e+06
2003	1.25616e+06
2004	1.40199e+06
2005	1.47216e+06
2006	1.43346e+06
2007	1.26822e+06
2008	1.13123e+06
2009	938571
2010	890397
2011	833998
2012	870675
2013	861992
2014	842251
2015	822449
2016	829732

## Sheet: Population by Year of Entry
		1991	1992	1993	1994	1995	1996	1997	1998	1999	2000	2001	2002	2003	2004	2005	2006	2007	2008	2009	2010	2011	2012	2013	2014	2015	2016	2017
Year of Entry
Initial Population		3335500	3.17873e+06	3.02933e+06	2.88695e+06	2.75127e+06	2.62196e+06	2.49872e+06	2.38128e+06	2.26936e+06	2.1627e+06	2.12594e+06	2.0898e+06	2.05427e+06	2.01935e+06	1.98502e+06	1.95127e+06	1.9181e+06	1.88549e+06	1.85344e+06	1.82193e+06	1.79096e+06	1.76051e+06	1.73058e+06	1.70116e+06	1.67224e+06	1.64382e+06	1.61587e+06
1990		1.1673e+06	1.11244e+06	1.06015e+06	1.01033e+06	962841	917587	874461	833361	794193	756866	743999	731351	718918	706697	694683	682873	671264	659853	648635	637609	626769	616114	605640	595344	585223	575275	565495
1991			1.20239e+06	1.14588e+06	1.09202e+06	1.0407e+06	991786	945172	900749	858414	818068	779619	766365	753337	740530	727941	715566	703402	691444	679689	668135	656776	645611	634636	623847	613242	602817	592569
1992				1.23015e+06	1.17233e+06	1.11723e+06	1.06472e+06	1.01468e+06	966992	921543	878231	836954	797617	784057	770728	757626	744746	732086	719640	707406	695380	683559	671939	660516	649287	638249	627399	616733
1993					1.28328e+06	1.22297e+06	1.16549e+06	1.11071e+06	1.05851e+06	1.00876e+06	961346	916162	873103	832067	817922	804017	790349	776913	763705	750722	737960	725415	713083	700960	689044	677330	665816	654497
1994						1.0762e+06	1.02562e+06	977416	931477	887698	845976	806215	768323	732212	697798	685935	674274	662812	651544	640468	629580	618877	608356	598014	587848	577854	568031	558374
1995							1.37428e+06	1.30969e+06	1.24813e+06	1.18947e+06	1.13356e+06	1.08029e+06	1.02951e+06	981127	935014	891068	875920	861029	846392	832003	817859	803956	790288	776853	763647	750665	737904	725359
1996								1.5877e+06	1.51308e+06	1.44197e+06	1.37419e+06	1.30961e+06	1.24805e+06	1.1894e+06	1.13349e+06	1.08022e+06	1.02945e+06	1.01195e+06	994746	977836	961212	944872	928809	913019	897498	882240	867242	852499
1997									1.43284e+06	1.36549e+06	1.30131e+06	1.24015e+06	1.18187e+06	1.12632e+06	1.07338e+06	1.02293e+06	974854	929036	913242	897717	882456	867454	852708	838212	823962	809955	796185	782650
1998										1.55801e+06	1.48479e+06	1.415e+06	1.3485e+06	1.28512e+06	1.22472e+06	1.16715e+06	1.1123e+06	1.06002e+06	1.0102e+06	993026	976145	959550	943238	927203	911440	895946	880715	865743
1999											1.57842e+06	1.50424e+06	1.43354e+06	1.36616e+06	1.30195e+06	1.24076e+06	1.18244e+06	1.12687e+06	1.07391e+06	1.02343e+06	1.00603e+06	988932	972120	955594	939349	923380	907682	892252
2000												1.67162e+06	1.59306e+06	1.51818e+06	1.44683e+06	1.37883e+06	1.31402e+06	1.25226e+06	1.19341e+06	1.13732e+06	1.08386e+06	1.06544e+06	1.04733e+06	1.02952e+06	1.01202e+06	994815	977903	961279
2001													1.17794e+06	1.12258e+06	1.06982e+06	1.01954e+06	971620	925954	882434	840960	801434	763767	750783	738020	725473	713140	701017	689100
2002														879726	838379	798975	761423	725636	691532	659030	628055	598537	570405	560708	551176	541806	532596	523542
2003															812480	774294	737902	703221	670169	638671	608654	580047	552785	526804	517848	509045	500391	491884
2004																1.07124e+06	1.02089e+06	972910	927183	883606	842076	802499	764781	728837	694581	682773	671166	659756
2005																	1.18066e+06	1.12517e+06	1.07229e+06	1.02189e+06	973863	928092	884471	842901	803285	765530	752516	739724
2006																		1.12951e+06	1.07643e+06	1.02584e+06	977621	931673	887884	846154	806384	768484	732365	719915
2007																			786098	749151	713941	680386	648408	617933	588890	561212	534835	509698
2008																				622987	593706	565802	539209	513867	489715	466698	444763	423860
2009																					349526	333098	317443	302523	288304	274754	261841	249534
2010																						326225	310893	296281	282355	269085	256438	244385
2011																							280940	267736	255152	243160	231731	220840
2012																								241607	230252	219430	209117	199288
2013																									20188	19239.2	18334.9	17473.2
2014																										391104	372722	355204
2015																											486099	463252
2016																												463190
2017
		4.5028e+06	5.49356e+06	6.46551e+06	7.44492e+06	8.17121e+06	9.16144e+06	1.03186e+07	1.12664e+07	1.22949e+07	1.32955e+07	1.44298e+07	1.5039e+07	1.53435e+07	1.55891e+07	1.61002e+07	1.67206e+07	1.72882e+07	1.75097e+07	1.75838e+07	1.7407e+07	1.72427e+07	1.70581e+07	1.68541e+07	1.64481e+07	1.64466e+07	1.65567e+07	1.6654e+07
Each row corresponds to the population of undocumented immigrants who arrived at the specified year; each column shows the population of the undocumented immigrant who are still in the country at the beginning of the specified year.
